# Supplementary material for: Selective effect of phosphatidylcholine on the lysis of adipocytes
Source: PubMed Central journal article supplement (PMC5413042; doi:10.1371/journal.pone.0176722), 2017-05-02

S2 Fig

A

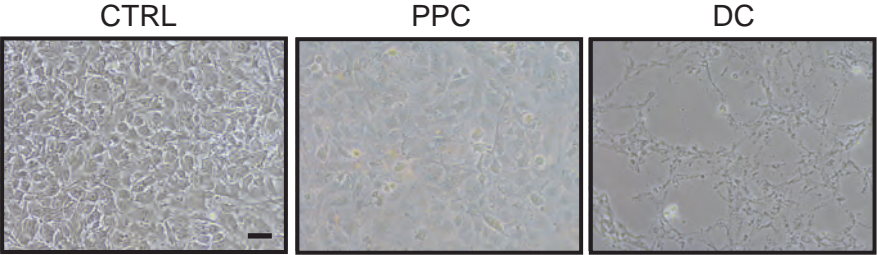

B

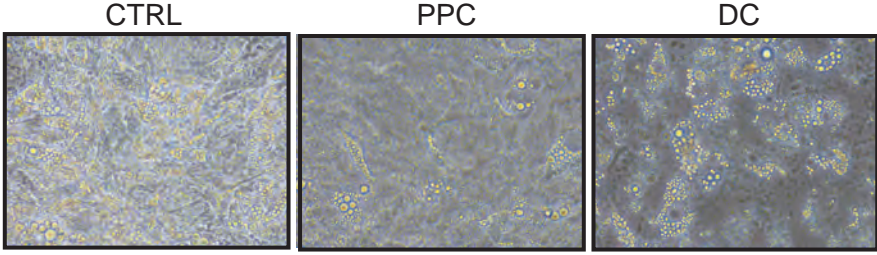

Supplement: pone.0176722.s003.pdf [file pone.0176722.s003.pdf]
